# Supplementary material for: Comparative Transcriptome Analysis between Gynoecious and Monoecious Plants Identifies Regulatory Networks Controlling Sex Determination in Jatropha curcas
Source: PubMed Central journal article supplement (PMC5239818; doi:10.3389/fpls.2016.01953), 2017-01-17
Supplement: Image_1.pdf [file Image_1.pdf]

Supplementary Figure S1

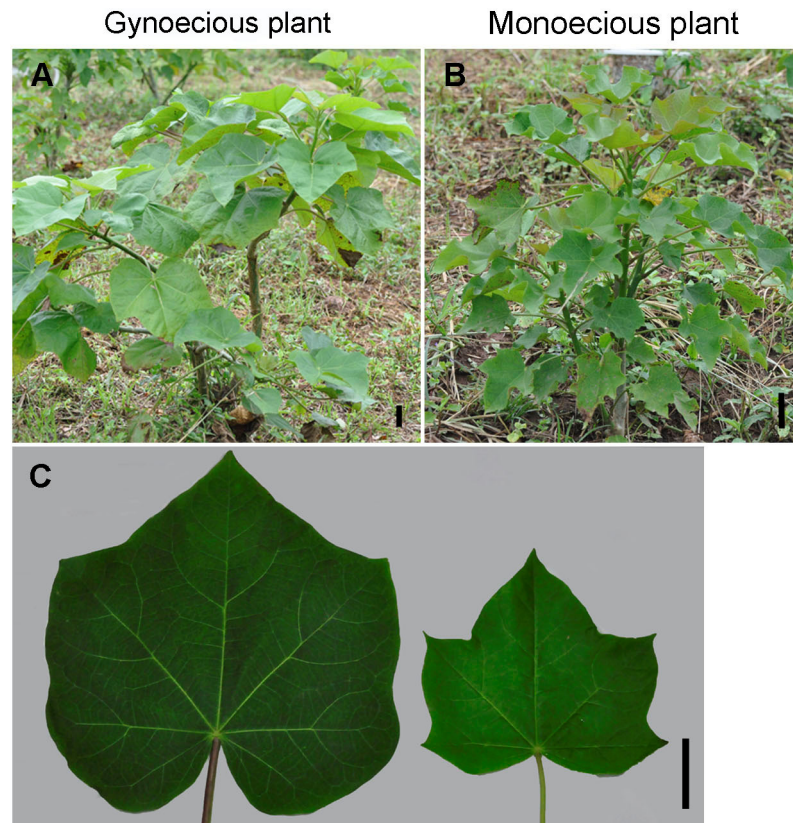

**Figure S1** Phenotypes of gynoecious and monoecious *Jatropha* plants. (A) Gynoecious plant; (B) Monoecious plant; (C) Leaf of gynoecious (left) and monoecious (right) *Jatropha*; bar = 5.0 cm.
