# Supplementary material for: Comparative Transcriptome Analysis between Gynoecious and Monoecious Plants Identifies Regulatory Networks Controlling Sex Determination in Jatropha curcas
Source: PubMed Central journal article supplement (PMC5239818; doi:10.3389/fpls.2016.01953), 2017-01-17
Supplement: Image_2.pdf [file Image_2.pdf]

Supplementary Figure S2

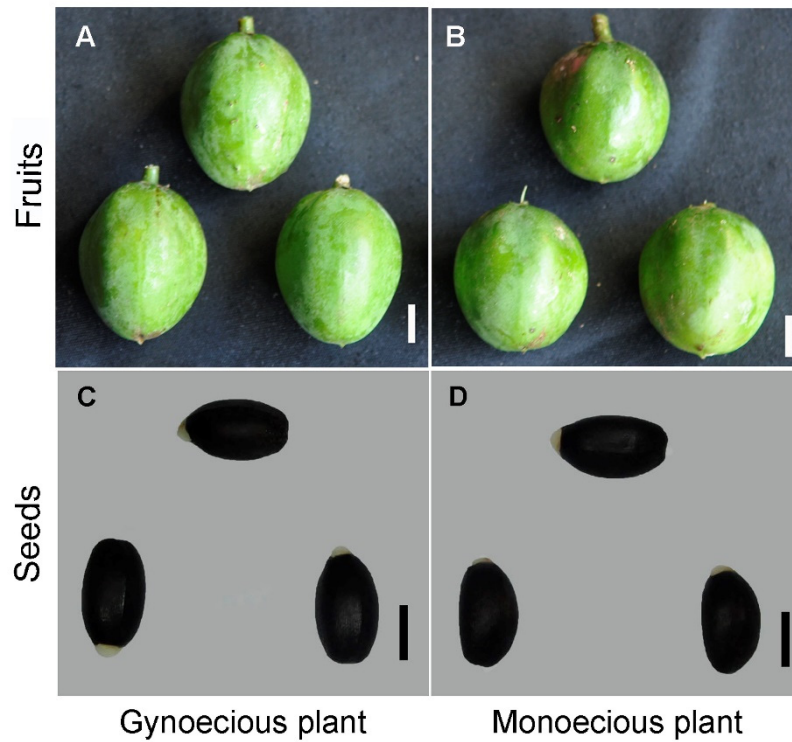

**Figure S2 Comparison of fruits and seeds between gynoeious and monoecious *Jatropha*.**

Fruits of gynoeious (A) and monoecious (B) plants; Seeds of gynoeious (C) and monoecious (D) plants; bar = 1.0 cm.
